# Supplementary material for: Proteomic analysis of combined IGF1 receptor targeted therapy and chemotherapy identifies signatures associated with survival in breast cancer patients
Source: PubMed Central journal article supplement (PMC7197451; doi:10.18632/oncotarget.27566), 2020-04-28
Supplement: oncotarget-11-1515-s002.pdf [file oncotarget-11-1515-s002.pdf]

**Supplementary Table 1: Volcano plot analysis.** The table lists proteins identified by Volcano plot analysis. Pink cells represent up-regulated proteins and blue cells represent down-regulated proteins.

| 24 hr    |          |          | 48 hr     |           |          |
|----------|----------|----------|-----------|-----------|----------|
| AEW      | GEM      | AEW+GEM  | AEW       | GEM       | AEW+GEM  |
| 88 up    | 51 up    | 95 up    | 40 up     | 21 up     | 86 up    |
| 27 down  | 4 down   | 64 down  | 51 down   | 72 down   | 134 down |
| TIMP3    | ANXA6    | SERPINC1 | DCTN4     | ABR       | DNM1L    |
| DST      | C11orf98 | TIMP3    | ABR       | KRT16     | XIAP     |
| TRAP1    | NA       | PARVB    | TXNDC12   | GBA       | GBA      |
| PRRC1    | CAPZB    | LCMT1    | GBA       | COG8      | ABR      |
| GSS      | NA       | TRAP1    | ALAD      | CC2D1A    | PPFIA1   |
| CNOT10   | PLEKHG3  | IK       | CC2D1A    | PPFIA1    | CDCA5    |
| ESR1     | STARD10  | DST      | SH3GLB1   | MAP1LC3B2 | RAB25    |
| VPS36    | HNRNPD   | PGAM5    | SNRPD1    | GNB1      | CC2D1A   |
| CAPN1    | ELF2     | PRRC1    | LGALS3    | FBLN1     | TRAF4    |
| EEF1B2   | HNRNPH1  | UNG      | THBS1     | GPD1L     | BCAS1    |
| ABHD14B  | ZNF787   | CNOT10   | S100A10   | NECAP1    | ZNF706   |
| PCBP2    | ALG13    | VPS36    | GSTZ1     | THBS1     | AHSG     |
| SLC3A2   | ZMYND8   | TACC3    | EMG1      | HBA1      | GC       |
| C11orf68 | WASH3P   | A2M      | ZFYVE21   | BRD3      | PLEKHA6  |
| MVD      | NACA     | ATP5O    | QTRT1     | HMGCS1    | AFP      |
| UNG      | ALYREF   | USP39    | SELENBP1  | YWHAH     | TACC1    |
| APPL1    | CDK11B   | PEPD     | MAT2B     | ITIH2     | LGALS3   |
| AHCYL1   | RBM26    | GSS      | GABARAPL2 | FKBP3     | TUBB2A   |
| ACAA2    | EEF1D    | APPL1    | LLGL2     | SYTL2     | FBLN1    |
| NIT2     | UBA6     | LCPI     | HBA1      | OSTF1     | NA       |
| SEC24A   | EPPK1    | SVIL     | ENOPH1    | RPS16     | TMSB10   |
| COMT     | SBNO1    | KIFC1    | SUCLG2    | CTPS1     | ITIH2    |
| ESD      | C5orf51  | MARCKS   | ATP6V0D1  | THOC6     | PPL      |
| ALDH7A1  | UBTF     | ZMYND8   | OSTF1     | H2AFZ     | KIAA0101 |
| YPEL5    | TARSL2   | APEH     | PALLD     | TARS      | IQGAP3   |
| GSTZ1    | TCOF1    | RBX1     | RBM3      | MPP6      | HBA1     |

|          |           |          |          |           |          |
|----------|-----------|----------|----------|-----------|----------|
| ATP5B    | CNOT1     | MYO1C    | FLNB     | NUFIP2    | TPX2     |
| RNPEP    | TPM1      | ENO2     | N6AMT1   | RBM10     | USP9X    |
| STAT2    | HNRNPAB   | RTF1     | FBLN1    | SART1     | THBS1    |
| SETD1A   | FMR1      | FN3KRP   | COMT     | MAT2A     | ECT2     |
| PSMD8    | FUBP1     | COMT     | FKBP3    | TBL1XR1   | CALR     |
| COPE     | SPTAN1    | RPS27L   | RPS16    | TYW5      | SYTL2    |
| GSE1     | PDE4DIP   | ATP6V1B2 | ITIH2    | TRAPPC9   | TACC3    |
| LLGL2    | HCFC1     | CLIC3    | PNKP     | VTA1      | KIAA1033 |
| TSTD1    | PFN2      | U2AF1    | SLK      | HIST1H2BJ | DYNLL1   |
| STAT3    | AIM1      | AHCYL1   | CUL7     | SMARCD2   | HMGN3    |
| FLOT1    | PMS2P1    | ESD      | UBL5     | RPL35     | KIFC1    |
| XRN1     | NUMA1     | WIPF2    | STARD10  | INTS4     | SERPINF1 |
| HAGH     | G6PD      | SLBP     | DYNLT1   | RWDD1     | LAP3     |
| EPM2AIP1 | TYW5      | AKR1A1   | VPS29    | GTF2F1    | CMC1     |
| RECQL    | KIF2A     | HZGJ     | DDX10    | HNRNPH3   | SUCLG2   |
| AKR1A1   | RAVER1    | S100A13  | PSAT1    | VDAC2     | MB       |
| LCP1     | LRBA      | WNK1     | SETD1A   | UBLCP1    | GANAB    |
| ATP6V1B2 | PPP1R9B   | SEC24D   | SRFBP1   | STX16     | GSN      |
| CA12     | MYO6      | CASP7    | FRA10AC1 | HNRNPUL1  | LIMA1    |
| AP1B1    | PGP       | C21orf33 | TSG101   | ZNF787    | GSTZ1    |
| TRIM26   | ZNF316    | PREX1    | NSF      | ABHD14B   | POLR2J   |
| FAM98A   | DDTL      | ALDH16A1 | HEXB     | VPS50     | S100A10  |
| MIF      | MAP1LC3B2 | CMBL     | STX16    | MAPK9     | KIF11    |
| RBM47    | RBM47     | CBX5     | INTS4    | HSP90B1   | SELENBP1 |
| SHMT1    | DBNL      | TSTD1    | GEMIN4   | RPL7L1    | HMGN2    |
| PITPNA   | SHTN1     | XRCC1    | PSMC1    | DDX10     | STAT1    |
| NUMA1    | UNC119B   | TXLNG    | SUGT1    | NUP133    | NDRG1    |
| SNRPD3   | SMCHD1    | STAT2    | NUFIP2   | FBXL15    | LIG1     |
| CMBL     | HDLBP     | CRYL1    | DDX52    | DHPS      | YWHAH    |
| PRKAR2A  |           | ACAA2    | SCAMP3   | EPCAM     | EPS8L2   |
| GSR      |           | RNF14    | PUM3     | UTP15     | PREX1    |
| PREX1    |           | ARHGAP35 | ZNF579   | ADSS      | ITIH3    |
| HADHA    |           | HSD17B4  | CBX1     | MEMO1     | CLIC3    |
| COPS5    |           | PYGB     | PSPH     | IMP4      | SLBP     |
| DUSP12   |           | AKR7A2   | RAB6A    | EXOC3     | LLGL2    |
| PRPSAP2  |           | PITPNA   | GABPA    | GSKIP     | BRD3     |
| DDAH2    |           | TCF3     | LARS     | WRNIP1    | HAGH     |

|          |  |         |          |           |          |
|----------|--|---------|----------|-----------|----------|
| PGD      |  | RECQL   | DDX47    | OGFOD1    | LRWD1    |
| FBP1     |  | ACTN1   | WDR36    | BUD31     | DEK      |
| EIF4A2   |  | RCN1    | RPL22L1  | BOP1      | ATP6V0D1 |
| RPRD1A   |  | NR2C2AP | IRF2BP2  | HIST1H2BK | S100A16  |
| XPO4     |  | MACROD1 | MAT2A    | CALU      | QTRT1    |
| VPS35    |  | EHMT1   | RRP12    | HDGF      | AFF4     |
| DIP2B    |  | DBR1    | CRABP2   | RER1      | COMT     |
| ISOC1    |  | ABHD14B | ZC3H11A  | RAB6A     | RBBP6    |
| ATIC     |  | SYTL2   | ADSS     | ENO2      | UGDH     |
| RPRD1B   |  | CLIC4   | TRMT5    | PWP1      | DDAH1    |
| SVIL     |  | LIMA1   | GLB1     | CCDC9     | RABGAP1  |
| NA       |  | DLD     | NOP9     | ZMYM2     | FAM49B   |
| BLMH     |  | GALK1   | ZNF768   | NOP9      | SH3BGRL  |
| SHOC2    |  | STAT3   | ASNS     | ERP29     | FKBP3    |
| UGGT1    |  | RPRD1B  | CTSB     | CDK12     | OSTF1    |
| RNF113A  |  | HOOK2   | IFI30    | NSA2      | PALLD    |
| ALDH16A1 |  | NA      | PPT1     | IRF2BPL   | KIF4A    |
| THAP11   |  | CMPK1   | PFN2     | CALCOCO2  | FAM107B  |
| SAFB     |  | ACIN1   | RRM2B    | GANAB     | FLNB     |
| TFRC     |  | CKMT1A  | KIAA0391 | BTF3      | LASP1    |
| HMG5     |  | CHTF8   | FLCN     | ATP5C1    | CRK      |
| PRDX3    |  | YPEL5   | SLIRP    | HIST2H2AC | PPIC     |
| S100A13  |  | LLGL2   | RANBP6   | TMEM165   | PPP1R2   |
| PACS1    |  | PLCG1   | MYO6     | MYO6      | PFKM     |
| CASP7    |  | NPNT    | MBNL3    | MZT2B     | KDM1A    |
| RTFDC1   |  | TXN     | KIF3B    | HSDL2     | NARFL    |
| PELO     |  | PFKL    | ATF7IP   | KIAA0391  | DDX47    |
| UCK2     |  | CAND1   | ZMIZ2    | MBNL3     | TKT      |
| RABL6    |  | FBP1    |          | KIF3B     | KIF1BP   |
| PNMA1    |  | DDAH2   |          | AAR2      | BOP1     |
| RPL23    |  | FDPS    |          |           | DNAAF5   |
| PAF1     |  | FAM98A  |          |           | VPRBP    |
| FAM83D   |  | DNAJA1  |          |           | STX16    |
| ADI1     |  | ARMC8   |          |           | UBA1     |
| IKBKG    |  | EIF3E   |          |           | EIF3D    |
| KIF2C    |  | SURF2   |          |           | GNL3     |
| HECTD1   |  | RPL23   |          |           | H2AFZ    |

|         |  |        |  |  |         |
|---------|--|--------|--|--|---------|
| POLR2E  |  | KLC1   |  |  | RBM27   |
| LLPH    |  | DDX5   |  |  | USP15   |
| RPL22L1 |  | GRB2   |  |  | SCYL1   |
| FAIM    |  | ASUN   |  |  | RAB7A   |
| MED17   |  | GEMIN5 |  |  | NAA15   |
| NOP16   |  | NOB1   |  |  | SRRM1   |
| TYMS    |  | DIMT1  |  |  | XPO1    |
| ZC3H7B  |  | PDCD2  |  |  | DPF2    |
| DHX16   |  | MYOF   |  |  | PDCD4   |
| CCDC9   |  | LLPH   |  |  | CUL4B   |
| RRBP1   |  | PPP6R1 |  |  | PRDX6   |
| SPATS2L |  | HECTD1 |  |  | CHORDC1 |
| EEF2K   |  | IKBKG  |  |  | TRUB1   |
| RINT1   |  | ESF1   |  |  | DDX10   |
| ZMIZ2   |  | BZW1   |  |  | NUDCD1  |
