# Supplementary material for: Proteomic analysis of combined IGF1 receptor targeted therapy and chemotherapy identifies signatures associated with survival in breast cancer patients
Source: PubMed Central journal article supplement (PMC7197451; doi:10.18632/oncotarget.27566), 2020-04-28
Supplement: oncotarget-11-1515-s003.pdf [file oncotarget-11-1515-s003.pdf]

**Supplementary Table 5: List of mRNA whose expression differ between LOW and HIGH IGF1R expressing groups. LOW1 and HIGH1 represent levels of IGF1R while LOW2 and HIGH2 represent levels of the named mRNA.**

| mRNA     | HIGH1-<br>HIGH2<br>(n) | HIGH1-<br>LOW2<br>(n) | LOW1-<br>HIGH2<br>(n) | LOW1-<br>LOW2<br>(n) | mRNA2<br>p-value | Confidence<br>level |
|----------|------------------------|-----------------------|-----------------------|----------------------|------------------|---------------------|
| PSMC4    | 129                    | 443                   | 443                   | 889                  | 1.1353E-07       | High                |
| PREX1    | 309                    | 263                   | 263                   | 1069                 | 1.28071E-07      | High                |
| RPL7L1   | 138                    | 434                   | 434                   | 898                  | 1.89245E-07      | High                |
| ZNF787   | 113                    | 459                   | 459                   | 873                  | 2.36059E-07      | High                |
| TRUB1    | 166                    | 406                   | 406                   | 926                  | 4.4311E-07       | High                |
| BOP1     | 116                    | 456                   | 456                   | 876                  | 6.97803E-07      | High                |
| FLNB     | 348                    | 224                   | 224                   | 1108                 | 7.10104E-07      | High                |
| FBLN1    | 132                    | 440                   | 440                   | 892                  | 8.68619E-07      | High                |
| AHSG     | 178                    | 394                   | 394                   | 938                  | 1.13312E-06      | High                |
| MEMO1    | 82                     | 490                   | 490                   | 842                  | 1.1368E-06       | High                |
| SART1    | 188                    | 384                   | 384                   | 948                  | 1.2111E-06       | High                |
| PALLD    | 133                    | 439                   | 439                   | 893                  | 1.44611E-06      | High                |
| PSMC1    | 103                    | 469                   | 469                   | 863                  | 1.49638E-06      | High                |
| MYOF     | 207                    | 365                   | 365                   | 967                  | 1.62608E-06      | High                |
| UTP23    | 160                    | 412                   | 412                   | 920                  | 1.65659E-06      | High                |
| UBE2C    | 115                    | 457                   | 457                   | 875                  | 1.74035E-06      | High                |
| MAT2B    | 135                    | 437                   | 437                   | 895                  | 1.81918E-06      | High                |
| WRNIP1   | 168                    | 404                   | 404                   | 928                  | 1.87446E-06      | High                |
| KIFC1    | 124                    | 448                   | 448                   | 884                  | 1.98602E-06      | High                |
| GTPBP4   | 88                     | 484                   | 484                   | 848                  | 2.20502E-06      | High                |
| PSMD2    | 130                    | 442                   | 442                   | 890                  | 2.29306E-06      | High                |
| PPIC     | 82                     | 490                   | 490                   | 842                  | 2.43146E-06      | High                |
| GNL3     | 173                    | 399                   | 399                   | 933                  | 2.50346E-06      | High                |
| DNM1L    | 122                    | 450                   | 450                   | 882                  | 2.75986E-06      | High                |
| TPX2     | 109                    | 463                   | 463                   | 869                  | 3.16217E-06      | Low                 |
| VPRBP    | 199                    | 373                   | 373                   | 959                  | 3.39763E-06      | Low                 |
| CALCOCO2 | 218                    | 354                   | 354                   | 978                  | 3.40121E-06      | Low                 |
| UBE2O    | 202                    | 370                   | 370                   | 962                  | 3.70444E-06      | Low                 |
| LLPH     | 150                    | 422                   | 422                   | 910                  | 4.30833E-06      | Low                 |

|         |     |     |     |      |             |     |
|---------|-----|-----|-----|------|-------------|-----|
| COMMD9  | 146 | 426 | 426 | 906  | 4.63131E-06 | Low |
| IRF2BP2 | 158 | 414 | 414 | 918  | 4.72735E-06 | Low |
| CFL2    | 152 | 420 | 420 | 912  | 5.00152E-06 | Low |
| UTP14A  | 147 | 425 | 425 | 907  | 5.05413E-06 | Low |
| SH3BGRL | 222 | 350 | 350 | 982  | 5.1078E-06  | Low |
| ARAP1   | 192 | 380 | 380 | 952  | 5.58064E-06 | Low |
| SRFBP1  | 197 | 375 | 375 | 957  | 5.85228E-06 | Low |
| SNF8    | 157 | 415 | 415 | 917  | 6.16116E-06 | Low |
| BTF3    | 252 | 320 | 320 | 1012 | 6.2201E-06  | Low |
| ATG3    | 96  | 476 | 476 | 856  | 6.36248E-06 | Low |
| COMT    | 128 | 444 | 444 | 888  | 6.38563E-06 | Low |
| DDX21   | 131 | 441 | 441 | 891  | 6.60696E-06 | Low |
| LGALS3  | 111 | 461 | 461 | 871  | 7.11666E-06 | Low |
| DDX10   | 147 | 425 | 425 | 907  | 7.16048E-06 | Low |
| PDCD4   | 205 | 367 | 367 | 965  | 7.37794E-06 | Low |
| SETD1A  | 218 | 354 | 354 | 978  | 7.43278E-06 | Low |
| KDM1A   | 176 | 396 | 396 | 936  | 7.7437E-06  | Low |
| NUFIP2  | 204 | 368 | 368 | 964  | 8.05359E-06 | Low |
| CALU    | 90  | 482 | 482 | 850  | 8.5607E-06  | Low |
| GEMIN5  | 214 | 358 | 358 | 974  | 8.71726E-06 | Low |
| UBA1    | 207 | 365 | 365 | 967  | 9.41849E-06 | Low |
| QTRT1   | 255 | 317 | 317 | 1015 | 9.47348E-06 | Low |
| CUL7    | 215 | 357 | 357 | 975  | 9.51856E-06 | Low |
| SLK     | 162 | 410 | 410 | 922  | 9.55547E-06 | Low |
| CLTB    | 128 | 443 | 444 | 889  | 9.61451E-06 | Low |
| PWP1    | 102 | 470 | 470 | 862  | 9.7439E-06  | Low |
| POLR2J  | 140 | 432 | 432 | 900  | 9.99375E-06 | Low |
| KIF11   | 140 | 432 | 432 | 900  | 1.01106E-05 | Low |
| YWHAH   | 140 | 432 | 432 | 900  | 1.01437E-05 | Low |
| ZNF579  | 217 | 355 | 355 | 977  | 1.02173E-05 | Low |
| TRMT5   | 220 | 352 | 352 | 980  | 1.02746E-05 | Low |
| ASNS    | 128 | 444 | 444 | 888  | 1.11339E-05 | Low |
| RBM3    | 124 | 448 | 448 | 884  | 1.11948E-05 | Low |
| CC2D1A  | 212 | 360 | 360 | 972  | 1.13348E-05 | Low |
| NOL11   | 157 | 415 | 415 | 917  | 1.16583E-05 | Low |
| ZFYVE21 | 156 | 416 | 416 | 916  | 1.18341E-05 | Low |
| PRDX6   | 131 | 441 | 441 | 891  | 1.18409E-05 | Low |
| EIF3D   | 179 | 393 | 393 | 939  | 1.19781E-05 | Low |

|          |     |     |     |      |             |     |
|----------|-----|-----|-----|------|-------------|-----|
| SAP30    | 138 | 434 | 434 | 898  | 1.2064E-05  | Low |
| BRD3     | 234 | 338 | 338 | 994  | 1.21551E-05 | Low |
| GPD1L    | 248 | 324 | 324 | 1008 | 1.21819E-05 | Low |
| HDGF     | 131 | 441 | 441 | 891  | 1.22394E-05 | Low |
| RANBP6   | 174 | 398 | 398 | 934  | 1.2455E-05  | Low |
| EXOC2    | 243 | 329 | 329 | 1003 | 1.24616E-05 | Low |
| SRPK2    | 252 | 320 | 320 | 1012 | 1.25383E-05 | Low |
| SCAMP3   | 187 | 385 | 385 | 947  | 1.26011E-05 | Low |
| PFKM     | 206 | 366 | 366 | 966  | 1.26755E-05 | Low |
| HUWE1    | 224 | 348 | 348 | 984  | 1.26921E-05 | Low |
| SNRPD1   | 183 | 389 | 389 | 943  | 1.28087E-05 | Low |
| CUL5     | 163 | 409 | 409 | 923  | 1.28914E-05 | Low |
| KIF3B    | 236 | 336 | 336 | 996  | 1.30225E-05 | Low |
| SFSWAP   | 213 | 359 | 359 | 973  | 1.32073E-05 | Low |
| ZHX2     | 176 | 396 | 396 | 936  | 1.32426E-05 | Low |
| COG8     | 163 | 409 | 409 | 923  | 1.32472E-05 | Low |
| KIAA0391 | 167 | 405 | 405 | 927  | 1.34441E-05 | Low |
| TXNDC12  | 180 | 392 | 392 | 940  | 1.34792E-05 | Low |
| DCTN4    | 260 | 312 | 312 | 1020 | 1.36451E-05 | Low |
| THOC6    | 197 | 375 | 375 | 957  | 1.38165E-05 | Low |
| UTP3     | 151 | 421 | 421 | 911  | 1.38975E-05 | Low |
| HDAC2    | 99  | 473 | 473 | 859  | 1.39485E-05 | Low |
| TACC3    | 141 | 431 | 431 | 901  | 1.396E-05   | Low |
| ENO2     | 274 | 298 | 298 | 1034 | 1.42546E-05 | Low |
| NUDCD1   | 143 | 429 | 429 | 903  | 1.43965E-05 | Low |
| ATP5C1   | 103 | 469 | 469 | 863  | 1.44021E-05 | Low |
| ERP29    | 133 | 439 | 439 | 893  | 1.4413E-05  | Low |
| TUBB2A   | 163 | 409 | 409 | 923  | 1.4503E-05  | Low |
| PPFIA1   | 218 | 354 | 354 | 978  | 1.45612E-05 | Low |
| RPL26L1  | 162 | 410 | 410 | 922  | 1.45825E-05 | Low |
| ZMYM2    | 237 | 335 | 335 | 997  | 1.47705E-05 | Low |
| CDV3     | 168 | 404 | 404 | 928  | 1.48137E-05 | Low |
| GABPA    | 185 | 387 | 387 | 945  | 1.48802E-05 | Low |
| FLCN     | 171 | 401 | 401 | 931  | 1.4908E-05  | Low |
| RPL35    | 152 | 420 | 420 | 912  | 1.49483E-05 | Low |
| HSP90B1  | 149 | 423 | 423 | 909  | 1.49698E-05 | Low |
| IRF2BPL  | 235 | 337 | 337 | 995  | 1.4974E-05  | Low |
| MYO6     | 245 | 327 | 327 | 1005 | 1.50498E-05 | Low |

|          |     |     |     |      |             |     |
|----------|-----|-----|-----|------|-------------|-----|
| PSMC2    | 100 | 472 | 472 | 860  | 1.50524E-05 | Low |
| FRA10AC1 | 225 | 347 | 347 | 985  | 1.50977E-05 | Low |
| SUGT1    | 175 | 398 | 397 | 934  | 1.51429E-05 | Low |
| NSA2     | 179 | 393 | 393 | 939  | 1.51491E-05 | Low |
| RABGAP1  | 217 | 355 | 355 | 977  | 1.52016E-05 | Low |
| HNRNPH3  | 175 | 397 | 397 | 935  | 1.52457E-05 | Low |
| IFI30    | 74  | 498 | 498 | 834  | 1.53572E-05 | Low |
| USP15    | 188 | 384 | 384 | 948  | 1.5364E-05  | Low |
| RAB6A    | 153 | 419 | 419 | 913  | 1.54081E-05 | Low |
| STARD10  | 268 | 304 | 304 | 1028 | 1.54268E-05 | Low |
| S100A16  | 89  | 483 | 483 | 849  | 1.54988E-05 | Low |
| SELENBP1 | 211 | 361 | 361 | 971  | 1.55724E-05 | Low |
| PIN4     | 201 | 371 | 371 | 961  | 1.55902E-05 | Low |
| CALR     | 106 | 466 | 466 | 866  | 1.56638E-05 | Low |
| LAP3     | 98  | 474 | 474 | 858  | 1.57943E-05 | Low |
| PSAT1    | 41  | 531 | 531 | 801  | 1.58445E-05 | Low |
| HMGCS1   | 136 | 436 | 436 | 896  | 1.59917E-05 | Low |
| OSTF1    | 96  | 476 | 476 | 856  | 1.59972E-05 | Low |
| INTS4    | 180 | 392 | 392 | 940  | 1.59993E-05 | Low |
| FKBP3    | 169 | 403 | 403 | 929  | 1.60197E-05 | Low |
| RAB3D    | 158 | 414 | 414 | 918  | 1.60383E-05 | Low |
| THBS1    | 140 | 432 | 432 | 900  | 1.61117E-05 | Low |
| GANAB    | 171 | 401 | 401 | 931  | 1.6132E-05  | Low |
| HMG2     | 204 | 368 | 368 | 964  | 1.61573E-05 | Low |
| UGDH     | 232 | 340 | 340 | 992  | 1.61607E-05 | Low |
| CLIC3    | 65  | 507 | 507 | 825  | 1.62612E-05 | Low |
| UBL5     | 184 | 388 | 388 | 944  | 1.62931E-05 | Low |
| AKT1S1   | 222 | 350 | 350 | 982  | 1.62991E-05 | Low |
| MAT2A    | 254 | 318 | 318 | 1014 | 1.63414E-05 | Low |
| RBBP6    | 265 | 307 | 307 | 1025 | 1.63823E-05 | Low |
| RRP12    | 189 | 383 | 383 | 949  | 1.64117E-05 | Low |
| LARS     | 195 | 377 | 377 | 955  | 1.64125E-05 | Low |
| SYTL2    | 292 | 280 | 280 | 1052 | 1.64573E-05 | Low |
| HIFX     | 237 | 335 | 335 | 997  | 1.65105E-05 | Low |
| USP9X    | 145 | 427 | 427 | 905  | 1.65202E-05 | Low |
| TARS     | 105 | 467 | 467 | 865  | 1.65333E-05 | Low |
| ZC3H11A  | 215 | 357 | 357 | 975  | 1.65347E-05 | Low |
| TMSB10   | 86  | 486 | 486 | 846  | 1.65391E-05 | Low |

|         |     |     |     |      |             |     |
|---------|-----|-----|-----|------|-------------|-----|
| S100A10 | 65  | 507 | 507 | 825  | 1.65563E-05 | Low |
| CRABP2  | 200 | 372 | 372 | 960  | 1.65748E-05 | Low |
| KIF4A   | 123 | 449 | 449 | 883  | 1.66749E-05 | Low |
| STAT1   | 97  | 475 | 475 | 857  | 1.66808E-05 | Low |
| ECT2    | 112 | 460 | 460 | 872  | 1.66829E-05 | Low |
| ALAD    | 189 | 383 | 383 | 949  | 1.67296E-05 | Low |
| EPS8L2  | 156 | 416 | 416 | 916  | 1.67441E-05 | Low |
| UBLCP1  | 116 | 456 | 456 | 876  | 1.67616E-05 | Low |
| CCDC9   | 201 | 371 | 371 | 961  | 1.67685E-05 | Low |
| DIS3L2  | 207 | 365 | 365 | 967  | 1.68062E-05 | Low |
| CDK12   | 58  | 514 | 514 | 818  | 1.68317E-05 | Low |
| NCDN    | 255 | 317 | 317 | 1015 | 1.68346E-05 | Low |
| XPO1    | 181 | 391 | 391 | 941  | 1.68551E-05 | Low |
| CTSB    | 115 | 457 | 457 | 875  | 1.68867E-05 | Low |
| SEC23IP | 235 | 337 | 337 | 995  | 1.69075E-05 | Low |
| RAB5A   | 200 | 372 | 372 | 960  | 1.69606E-05 | Low |
| ADSS    | 128 | 444 | 444 | 888  | 1.69623E-05 | Low |
| AFF4    | 199 | 373 | 373 | 959  | 1.69651E-05 | Low |
| LRPPRC  | 185 | 387 | 387 | 945  | 1.69705E-05 | Low |
| PUS7    | 147 | 425 | 425 | 907  | 1.69741E-05 | Low |
| RAB25   | 188 | 384 | 384 | 948  | 1.76618E-05 | Low |
